# Supplementary material
Source: PubMed Central journal article supplement (PMC3147395)
Supplement: supp_77_14_4802__1.pdf [file supp_77_14_4802__1.pdf]

## **Cholesterol degradation by *Gordonia cholesterolivorans***

**O. Drzyzga,<sup>1</sup> L. Fernández de las Heras,<sup>1</sup> V. Morales,<sup>2</sup> J. M. Navarro Llorens,<sup>1</sup> and J. Perera<sup>1\*</sup>**

Departamento de Bioquímica y Biología Molecular I, Universidad Complutense de Madrid, 28040 Madrid, Spain<sup>1</sup> and Departamento de Biología Medioambiental, Centro de Investigaciones Biológicas, Consejo Superior de Investigaciones Científicas (CSIC), 28040 Madrid, Spain<sup>2</sup>

\*Corresponding author. Mailing address: Departamento de Bioquímica y Biología Molecular I, Universidad Complutense de Madrid, Ciudad Universitaria, 28040 Madrid, Spain. Phone: +34 913944145. Fax: +34 913944672. E-mail: [jpererag@bio.ucm.es](mailto:jpererag@bio.ucm.es).

```

              GSGFGG              E
              *                  *
Gcho1 : MA-----QTDFDVLIIGSGFGGSVSAALRLIEKGYRVGIIIEAGRRFEDDQFAKTSWRLNRFVWAPKFGLMGIQRV : 69
Gcho2 : MPEPRQSAQSEPTAAVDRTHASRTEYDVLVIGSGFGGSVTALRLSEKGYRVGVLEAGRRFEDSDFAKTSWDLRRLWAPKLGAYGIQRI : 90
Gbro  : MAAH-----HEPTHFVLIIGSGFGGSVSAALRLVEKGYRVGVIEAGRRFEDDFAKTSWRLNKWLWAPKLGLYGIQRI : 73
Mlep  : MK-----PDYDVLIIIGSGFGGSVSAALRLTEKGYRVGVLEAGRRFAEDDFAKTSWDLRKFLWAPKLGCGYGIQRI : 68
Nfar  : MTQ-----RETFDVLIVGSGFGGSVTALRLVEKGYRVGVLEAGRRFADHELPKTSWDVRKFLWAPALGCGYGIQRI : 71
Rjos  : MSKQ-----RATEYDVLIVGSGFGGSVTALRLVEKGYKVGILEAGRRYADADF AKTSWDLKKFLWAPALGFFGIQRV : 72
Scoe  : MPQ-----DAYDYDVLVVGSGFGGSVSAALRLTEKGYRVGVLEAGRRFTRESLPKNSWDLKNYLWAPKLGMEGIQRI : 71

```

```

              GAGVGGGS
              *
Gcho1 : HMLKDVMMVLAGAGVGGGSLNYANTLYKPPPTFFFTDPQMNHITDWESELTPHYEQARRMLGVVTPNPTFTNSDRIMKEVADEMGVGDFTFTST : 159
Gcho2 : HLLRDCVILAGAGVGGGSLNYANTLYKPSGAFFEDPQMAHITDWEDELSPYYDQARRMLGVVTPNPHMTPADAIVKSVADDMGAGDTFIQT : 180
Gbro  : HALKDVMMILAGAGVGGGSLNYANTLYKPPPTFFFTDPQMRDITDWEDELSPYYEQARRMLGVVTPNPTVTESDRVHREVAEEMGAADTFTAT : 163
Mlep  : HLLRNVMILAGAGVGGGSLNYANTLYVPPPEPFFANQMAHITDWESELAHYDQARRMLGVVCPNPTFTDADRILKEWVDEMGGFDTFVPT : 158
Nfar  : HLLRDVILGAGAGVGGGSLNYANTLYVPPPEPFFRDPOMRDITDWEELTPYYEQAKMLGVVTPNPHMTPADEVFKKVAEDMGFGDTFVQT : 161
Rjos  : HLLRDCLILAGAGVGGGSLNYANTLYKPPASFFQDKQUSHITDWEDELTPYYEQARKMLGVVCPNPHMTPADELTKSVAEDMGVGDFTFIQT : 162
Scoe  : HLLGNVMMVLAGAGVGGGSLNYANTLYVPPKPFDDPQMRGITDWEELTPYYDQARRMLGVRLNPTMTPSDVHLKAAAERMGCDDTFHMA : 161

```

```

Gcho1 : PVGVFFGAKTG--GE--GAPGETVPDPYFGGAGPERTACTECGACMTGCRVGAKNLTKNYLGLAERNGATIIDRTTVDRLEQRADGSWL : 245
Gcho2 : PVGVYFG-----EPGRIVADPYFGGVGPDRITGCIIECGECMTGCRHGAKNTLLKNYLGLAEKIGAVVHPLTTVTDLRLAGDGTWE : 259
Gbro  : PVGVFFGAKTG--FA--GEPGQKVPDPYFGGVGPPERTACTECGACMTGCRVGAKNLTKNYLGLAERAGAIIDRTTVQSLEQSSDGTWL : 249
Mlep  : PVGVFFGPD----GT--QTPGRIVADPYFGGVGPVRTGCLIECGCCMTGCRHGAKNTLVKNYLGLAESAGAQVPMTTVKGFELRSEGLWE : 242
Nfar  : PVGVFFG-----EPGKIVDPYFGGVGPDRITGCIIECGECMTGCRHGAKNTLVKNYLGLAEQAGAVVPMTTVTAIRPLPDGTWD : 240
Rjos  : PVGVFFG-----EAGKIVDPYFGGVGPDRITGCIIECGECMTGCRHGAKNTLLKNYLGLAEKAGAEIIPMTTVTGLREASDGTWD : 241
Scoe  : PVGVFFGDGEDADGTAKAGPGEQVPDPYFGGAGPDRKACNECGECMTGCRHGAKNTLNENYLGLAEKAGAVVHPMTTAVSVTDDSRGGFA : 251

```

```

Gcho1 : VSAHGSSSWG--PFGA--RRRRFTADQVIVAAGTFNTQKIMHRAKG-STLPRLSDAMGVLTRTNSESILGAQAR-----SYDSSRDFT : 323
Gcho2 : VHTVRTGAM----MRK--RRRVFTARNVFLAAGTNGTQRLLHDLKDSGRLPELSSRLGELTRTNSESILGAIRY-----SVDESLDLT : 336
Gbro  : VGTHRSSSWG--PVGR--RARFTTAGQVIVAAGTFNTQRLLHHAKH-STLPQISDAMGVLTRTNSESILGAAAS-----HYDPRHDYS : 327
Mlep  : VHTVRTGSM----LRR--GRRFTTAAHLLLAAAGTNGTQRLLFRMRDQGKLPRLSQRLGVLTRTNSESIVGAGTL-----NVMPDRDLT : 319
Nfar  : VETKRTGKL----IGK--QPKTYTAGHVFLAAGTRGTQQLLFAMRDKGVLPKLSDRLGVLTRTNSESIVGAATK-----TLQPGQDFT : 317
Rjos  : VFTRRSGPR----KNR--NRKTYTAAANVFLAAGTNGTQHLLFDQKETGALPKISDRLGVLTRTNSESILGAAKN-----KVDPALELT : 318
Scoe  : VATLPTDRKKRGKRGKQQAGRTFTARRVFLAAGTYGTQTLHHRMKAGGQLPRLSDVVGELTRTNSEALVGAQTDDRRYRGATGEPRADFT : 341

```

+

```

Gcho1 : EGVAITSSFHPTSMTHIEPVRYGKGSNAMAAYLQTLTLDGG----SVPNRLGQFLKNAVTNPLMLLRLFFVRKMSERTVIALVMQNMNNSL : 409
Gcho2 : RGVAITSSFYPAADTHIEPVRYGKGSNMGMLQSPMTDGD----QRLPRWLRFLGIMLRHPIATARILAVKGMERTIIALVMQNLDNSI : 422
Gbro  : HGVAITSSFHPDPTTHIEPVRYGKGSNATAAYLQTLTLDGG----TRANRFQFLRQVARNPLLLVRLLVVRKMSORTVIALVMQNMNNSL : 413
Mlep  : HGVAITSSIHPTSDTHIEPIRYGKGSNMGLLQTLMTDGGPEGTDVPRWRQLLHQASEDPRRMLRLINPRMSERTVIALVMQHLDNSI : 409
Nfar  : KGVAITSSIHPTPDTHIEPVRYGKGSNFMGLLQTLMDVGG----GRIPRWLKFLLLVLRHPLDLLSFLSTKMSERTIISLVMQHLDNSI : 403
Rjos  : KGVAITSSFHPTSDTHVEPVRYGKGSNSMALLQTLTLDGG----G--RRWMTFLKELAKDPTA-LKVLTPYKMSERTIIALVMQNLDNSI : 401
Scoe  : RGVAITSSIHPDANTHIEPVRYGKGSNSMGGLSILQVPYAGQTASGASRVLGF LGHAAKHPLLVLRSLSNRKMERTIIGLVMQSLDNSL : 431

```

```

+
Gcho1 : TTFVRRKRGPF-KYVTSKQGI GEPNPTWIP EGN EATRRI AAKLP GGLAGGTWGDIFNMPLTAHYLGGCVISDDPATGVIDPYHRVNNYPTL : 498
Gcho2 : TTFTRRGLFGR-RLSSRQGHGRPNPTWIPAGNEATRRIAEKI-GGVPAGTWGEVFNVPMTAHFLGGCVIGENASTGVIDPYHRVHGYP TL : 510
Gbro : TTFVRRKRGPF-RYITSKQGHGEPNPTWIPKGNEATRRIASKLPGGMAGGTWGDIMNMPLTAHYLGGCAISDDPATGVIDAYHRVNNYPTL : 502
Mlep : TTFTKRGLGIRWYSSKQGN GEPNPSWIPIGNEVTRRLAAKI-DGVAGGTWGE LFNIP LTAHFLGGAVIGDNAEHGVIDPYHRVYGYPTL : 498
Nfar : TTYTKRGLFG-RKMTSKQGHGQPNPTWIPVGNQVTRKVAEEI-GGIAGGSWGEIFNIP LTAHFLGGAAIGADPEHGVIDPYHRVYGYPTL : 491
Rjos : TTYTKKGLFGRRKVT SKQGHGQPNPSWIPAGNEATRRIAEKI-DGRAGGTWGDVFNIP LTAHFLGGCTIIASEPSKGVIDPYHRVWGYPTL : 490
Scoe : TTHLKPAGVGKGLLTARQGHGSPMPKQIKAATDGASALAAEI-NGFAGSNVGELMGTPLTAHFLGGCPIGASRETGVIDPYHRLYGHFPGI : 520

```

```

VVDGAAVSANLG
* +
Gcho1 : HITDGAAITANLGVNPSLSIC AQAERAISLWPNKGEADPRPAQGDAYRRLTPVAPKAPVWPADAPGALRLPITPVEK-----A : 576
Gcho2 : SVVDGSAVSANLGVNPSLTISAQAERAAALWPNKGETDSRPAQYLYRRVVEPVQPAAPAVPESAPGALRLPITPVGRP-----VNR : 591
Gbro : HVTDGAAVSANLGVNPSLTIC AQAERAMALWPNKGEQDMRPAQGRPYERISPCPPVAPVWPAPGALRLPITPVEHLA-----ERTSVG : 587
Mlep : YVVDGAAISANLGVNPSLSIAAQAERAASLWPNKGEQDQRPROGESYRRLAPIAPDHPVWPVPAEALGALRW-----L : 569
Nfar : SVVDGAAVSANLGVNPSLTIT AQAERAAAYWPNKGEQDKRPPQEGYRRIDPVPPVRPWPVPAEAPAALVLPISPVRRT EQ----DTPAAG : 577
Rjos : SVVDGSAVSANLGVNPSLTISAQAERAASLWPNKGEKDLRPAQEGYRRLNVPVAPIAPVWPEGAPAALVLPIVEIRNSAVVPDAQKHGVA : 580
Scoe : SVVDGAAVSANLGVNPSLTIT AQAERAMSYWPNKGESDPRPAQGAGYERVAAVAPRSPAVPERAFGALRLPFVEMPTV-----PPKK : 602

```

FIG. S1: Comparison of amino acid sequences of some class I type cholesterol oxidases. The abbreviations of the bacterial strains as well as the accession numbers of the enzymes are as follows: Gcho1, *G. cholesterolivorans* (GU320250); Gcho2, *G. cholesterolivorans* (GU320251); Gbro, *G. bronchialis* (ACY20990); Mlep, *Mycobacterium leprae* (CAC29897); Nfar, *Nocardia facinica* (YP\_118824); Rjos, *Rhodococcus jostii* (ABG97978); Scoe, *Streptomyces coelicolor* (CAB82020). Consensus lettering indicates regions of the protein that are shown to be important in interactions with the FAD cofactor; asterisks indicate amino acids that are reported to make actual hydrogen bonding contact to the cofactor; amino acids marked with a “+” indicate residues that are implicated as playing a role in cholesterol catalysis (according to Vrielink and Ghisla [33]).

TABLE S1. ORFs of the 8 kb genomic sequence of *G. cholesterolivorans* (accession number GU320250) and some of their homologues in other Gram-positive strains.

| ORF<br>start/end          | Function (putative)<br>Length (aa) / % G+C                   | Best four homologues in Blast search<br>(% identity; locus_tag, species)                                                                                                                                           | Accession number                                       |
|---------------------------|--------------------------------------------------------------|--------------------------------------------------------------------------------------------------------------------------------------------------------------------------------------------------------------------|--------------------------------------------------------|
| hyp. protein<br>210/19    | hypothetical protein<br>63 / 62.5                            | 84%; Mvan_1510, <i>Mycobacterium vanbaalenii</i> PYR-1<br>84%; nfa8940, <i>Nocardia farcinica</i> IFM10152<br>82%; ROP_62580, <i>Rhodococcus opacus</i> B4<br>75%; Gbro_1725, <i>Gordonia bronchialis</i> DSM43247 | YP_952348<br>YP_117103<br>YP_002783450<br>YP_003272880 |
| IMP-DH<br>472/1983        | inosine-5-monophosphate<br>dehydrogenase; GuaB<br>503 / 69.6 | 86%; Gbro_1726, <i>Gordonia bronchialis</i> DSM43247<br>86%; ROP_62590, <i>Rhodococcus opacus</i> B4<br>83%; nfa8950, <i>Nocardia farcinica</i> IFM10152<br>82%; Mvan_1511, <i>Mycobacterium vanbaalenii</i> PYR-1 | YP_003272881<br>YP_002783451<br>YP_117104<br>YP_952349 |
| IMP-DH<br>2043/3212       | inosine-5-monophosphate<br>dehydrogenase<br>389 / 69.2       | 82%; Gbro_1727, <i>Gordonia bronchialis</i> DSM43247<br>75%; ROP_62600, <i>Rhodococcus opacus</i> B4<br>74%; Mvan_1512, <i>Mycobacterium vanbaalenii</i> PYR-1<br>73%; nfa8960, <i>Nocardia farcinica</i> IFM10152 | YP_003272882<br>YP_002783452<br>YP_952350<br>YP_117105 |
| hyp. protein<br>3290/3751 | hypothetical protein<br>153 / 63.0                           | 80%; KflaDRAFT_1454, <i>Kribbella flavida</i> DSM 17836<br>75%; SSAG_06863, <i>Streptomyces</i> sp. Mg1<br>72%; JNB_15918, <i>Janibacter</i> sp. HTCC2649<br>72%; AAur_4152, <i>Arthrobacter aurescens</i> TC1     | ZP_03860764<br>ZP_05002561<br>ZP_00996518<br>YP_949819 |
| Cyt. P450<br>3748/4971    | cytochrome P450<br>407 / 69.0                                | 69%; ROP_57840, <i>Rhodococcus opacus</i> B4<br>68%; RHA1_ro05719, <i>Rhodococcus jostii</i> RHA1                                                                                                                  | YP_002782976<br>YP_705656                              |

|                                              |                                                                    |                                                                                                                                                                                                                                           |                                                             |
|----------------------------------------------|--------------------------------------------------------------------|-------------------------------------------------------------------------------------------------------------------------------------------------------------------------------------------------------------------------------------------|-------------------------------------------------------------|
|                                              |                                                                    | 66%; Gbro_0988, <i>Gordonia bronchialis</i> DSM43247<br>66%; Mvan_4465, <i>Mycobacterium vanbaalenii</i> PYR-1                                                                                                                            | YP_003272192<br>YP_955246                                   |
| TetR<br>4917/5561                            | TetR family transcriptional<br>regulator protein<br>214 / 70.1     | 48%; RHA1_ro05718, <i>Rhodococcus jostii</i> RHA1<br>48%; ROP_57830, <i>Rhodococcus opacus</i> B4<br>46%; Gbro_0987, <i>Gordonia bronchialis</i> DSM43247<br>41%; Mvan_4466, <i>Mycobacterium vanbaalenii</i> PYR-1                       | YP_705655<br>YP_002782975<br>YP_003272191<br>YP_955247      |
| ChoOx-1<br>5616/7346                         | Cholesterol oxidase,<br>FAD dependent oxidoreductase<br>576 / 67.3 | 81%; Gbro_1728, <i>Gordonia bronchialis</i> DSM43247<br>66%; Mvan_1514, <i>Mycobacterium vanbaalenii</i> PYR-1<br>64%; RHA1_ro06201, <i>Rhodococcus jostii</i> RHA1<br>64%; ROP_62610, <i>Rhodococcus opacus</i> B4                       | YP_003272883<br>YP_952352<br>YP_706136<br>YP_002783453      |
| Serine O-acetyl-<br>transferase<br>8006/7425 | Serine O-acetyltransferase;<br>cysE<br>193 / 69.1                  | 71%; Bcav_2610, <i>Beutenbergia cavernae</i> DSM 12333<br>62%; Achl_2196, <i>Arthrobacter chlorophenolicus</i> A6<br>61%; RHOER0001_1022, <i>Rhodococcus erythropolis</i> SK121<br>59%; ckrop_0418, <i>Corynebacterium kroppenstedtii</i> | YP_002882617<br>YP_002488253<br>ZP_04388353<br>YP_002905740 |

---

TABLE S2. ORFs of the 12.8 kb genomic sequence of *G. cholesterolivorans* (accession number GU320251) and some of their homologues in other Gram-positive strains.

| ORF<br>start/end       | Function (putative)<br>Length (aa) / % G+C                         | Best four homologues in Blast search<br>(% identity; locus_tag, species)                                                                                                                                             | Accession number                                       |
|------------------------|--------------------------------------------------------------------|----------------------------------------------------------------------------------------------------------------------------------------------------------------------------------------------------------------------|--------------------------------------------------------|
| hyp. protein<br>19/522 | hypothetical protein<br>167 / 65.7                                 | 84%; Mvan_1510, <i>Mycobacterium vanbaalenii</i> PYR-1<br>84%; nfa8940, <i>Nocardia farcinica</i> IFM10152<br>82%; ROP_62580, <i>Rhodococcus opacus</i> B4<br>75%; Gbro_1725, <i>Gordonia bronchialis</i> DSM43247   | YP_952348<br>YP_117103<br>YP_002783450<br>YP_003272880 |
| TetR<br>1143/529       | TetR family transcriptional<br>regulator protein<br>204 / 68.5     | 36%; Noca_0123, <i>Nocardioides</i> sp. JS614<br>33%; MAB_3596c, <i>Mycobacterium abscessus</i><br>30%; RHA1_ro06321, <i>Rhodococcus jostii</i> RHA1<br>29%; Mvan_1745, <i>Mycobacterium vanbaalenii</i> PYR-1       | YP_921355<br>YP_001704325<br>YP_706256<br>YP_952574    |
| ChoOx-2<br>1375/3150   | Cholesterol oxidase,<br>FAD dependent oxidoreductase<br>591 / 67.7 | 74%; ROP_62610, <i>Rhodococcus opacus</i> B4<br>74%; RHA1_ro06201, <i>Rhodococcus jostii</i> RHA1<br>71%; MSMEG_1604, <i>Mycobacterium smegmatis</i> mc2 155<br>65%; Gbro_1728, <i>Gordonia bronchialis</i> DSM43247 | YP_002783453<br>YP_706136<br>YP_885983<br>YP_003272883 |
| supA<br>3147/3920      | supA, yrbEA<br>257 / 64.3                                          | 69%; ROP_46930, <i>Rhodococcus opacus</i> B4<br>61%; Mvan_5204, <i>Mycobacterium vanbaalenii</i> PYR-1<br>59%; RHA1_ro04696, <i>Rhodococcus jostii</i> RHA1<br>58%; Gbro_3952, <i>Gordonia bronchialis</i> DSM43247  | YP_002781885<br>YP_955981<br>YP_704640<br>YP_003275019 |
| supB<br>3954/4817      | supB, yrbEB<br>287 / 67.7                                          | 69%; ROP_46920, <i>Rhodococcus opacus</i> B4<br>59%; RHA1_ro04697, <i>Rhodococcus jostii</i> RHA1                                                                                                                    | YP_002781884<br>YP_704641                              |

|                     |                    |                                                                                                                                                                                                                     |                                                        |
|---------------------|--------------------|---------------------------------------------------------------------------------------------------------------------------------------------------------------------------------------------------------------------|--------------------------------------------------------|
|                     |                    | 57%; Gbro_3951, <i>Gordonia bronchialis</i> DSM43247<br>56%; Mvan_5203, <i>Mycobacterium vanbaalenii</i> PYR-1                                                                                                      | YP_003275018<br>YP_955980                              |
| mceA<br>4814/5980   | mceA<br>388 / 67.4 | 44%; ROP_46910, <i>Rhodococcus opacus</i> B4<br>33%; RHA1_ro04698, <i>Rhodococcus jostii</i> RHA1<br>33%; Gbro_3950, <i>Gordonia bronchialis</i> DSM43247<br>32%; Mvan_5202, <i>Mycobacterium vanbaalenii</i> PYR-1 | YP_002781883<br>YP_704642<br>YP_003275017<br>YP_955979 |
| mceB<br>5977/7014   | mceB<br>345 / 66.4 | 31%; Mvan_5201, <i>Mycobacterium vanbaalenii</i> PYR-1<br>50%; ROP_46900, <i>Rhodococcus opacus</i> B4<br>39%; RHA1_ro04699, <i>Rhodococcus jostii</i> RHA1<br>37%; Gbro_3949, <i>Gordonia bronchialis</i> DSM43247 | YP_955978<br>YP_002781882<br>YP_704643<br>YP_003275016 |
| mceC<br>7011/8003   | mceC<br>330 / 68.5 | 46%; ROP_46890, <i>Rhodococcus opacus</i> B4<br>33%; RHA1_ro04700, <i>Rhodococcus jostii</i> RHA1<br>32%; Mvan_5200, <i>Mycobacterium vanbaalenii</i> PYR-1<br>31%; Gbro_3948, <i>Gordonia bronchialis</i> DSM43247 | YP_002781881<br>YP_704644<br>YP_955977<br>YP_003275015 |
| mceD<br>8000/9121   | mceD<br>373 / 68.2 | 47%; ROP_46880, <i>Rhodococcus opacus</i> B4<br>41%; Mvan_5199, <i>Mycobacterium vanbaalenii</i> PYR-1<br>40%; RHA1_ro04701, <i>Rhodococcus jostii</i> RHA1<br>35%; Gbro_3947, <i>Gordonia bronchialis</i> DSM43247 | YP_002781880<br>YP_955976<br>YP_704645<br>YP_003275014 |
| mceE<br>9121/10221  | mceE<br>366 / 66.6 | 52%; RHA1_ro02748, <i>Rhodococcus jostii</i> RHA1<br>48%; ROP_46870, <i>Rhodococcus opacus</i> B4<br>34%; Gbro_3946, <i>Gordonia bronchialis</i> DSM43247<br>32%; Mvan_5198, <i>Mycobacterium vanbaalenii</i> PYR-1 | YP_702711<br>YP_002781879<br>YP_003275013<br>YP_955975 |
| mceF<br>10218/11630 | mceF<br>470 / 69.9 | 49%; RHA1_ro02747, <i>Rhodococcus jostii</i> RHA1<br>44%; ROP_46860, <i>Rhodococcus opacus</i> B4                                                                                                                   | YP_702710<br>YP_002781878                              |



|                              |                            |                                                        |              |
|------------------------------|----------------------------|--------------------------------------------------------|--------------|
|                              |                            | 34%; Mvan_5197, <i>Mycobacterium vanbaalenii</i> PYR-1 | YP_955974    |
|                              |                            | 30%; Gbro_3945, <i>Gordonia bronchialis</i> DSM43247   | YP_003275012 |
| hyp. protein-<br>12306/12785 | hyp. protein<br>159 / 68.8 | 46%; ROP_46840, <i>Rhodococcus opacus</i> B4           | YP_002781876 |
|                              |                            | 43%; RHA1_ro02745, <i>Rhodococcus jostii</i> RHA1      | YP_702708    |
|                              |                            | 27%; Mvan_5195, <i>Mycobacterium vanbaalenii</i> PYR-1 | YP_955972    |
|                              |                            | 26%; Gbro_3943, <i>Gordonia bronchialis</i> DSM43247   | YP_003275010 |

---

TABLE S3. Primers and conditions applied for RT-PCR and mutagenesis studies<sup>a</sup>

| Primer pairs             | Sequence                                                                  | Application                                                                                                                                                                                    |
|--------------------------|---------------------------------------------------------------------------|------------------------------------------------------------------------------------------------------------------------------------------------------------------------------------------------|
| ChoOx-1-Fw<br>ChoOx-1-Rv | CAGAGCTGACGCCCCATTAC<br>TCGGCCTCACCCCTTGTTT                               | Amplification of a 1264 bp fragment from the gene <i>choox-1</i> for RT-PCR study                                                                                                              |
| ChoOx-2-Fw<br>ChoOx-2-Rv | GATCTGCGGGCGGTTTCCTCT<br>ATCACCCCGGTTCGACGCATTCT                          | Amplification of a 1280 bp fragment from the gene <i>choox-2</i> for RT-PCR study                                                                                                              |
| CH118<br>CH119           | <u>GCTCTAGAGCAGCGTCAGCGAGTGGTCC</u><br><u>GGAATTCCAGGAACAGCAGCACGAAGC</u> | <i>choox-2</i> gene amplification product of 3442 bp including <i>Xba</i> I (CH118) and <i>Eco</i> RI (CH119) restriction sites used for apramycin cassette introduction for mutagenesis study |
| Apra-Fw<br>Apra-Rv       | GCAGAGCAGGATTCCCGTTGAG<br>ATTGCACTCCACCGCTGATGAC                          | Amplification of a 436 bp fragment within the apramycin ( <i>apra</i> ) resistance gene (originated from pIJ773) for mutagenesis study                                                         |
| Apra-Fw<br>CH11          | GCAGAGCAGGATTCCCGTTGAG<br>GGAGTCGACCGCTACCAACG                            | Amplification of a 3300 bp fragment including a part of the <i>apra</i> resistance gene and surrounding genes for mutagenesis study                                                            |
| Apra-Fw<br>CH13          | GCAGAGCAGGATTCCCGTTGAG<br>GATCTGCGGGCGGTTTCCTCT                           | Amplification of a 2445 bp fragment including a part of the <i>apra</i> resistance gene and surrounding genes for mutagenesis study                                                            |
| CH11<br>CH14             | GGAGTCGACCGCTACCAACG<br>ATCACCCCGGTTCGACGCATTCT                           | Amplification of a 3510 bp fragment <sup>b</sup> including the complete <i>apra</i> resistance gene and surrounding genes for mutagenesis study                                                |
| CH13<br>CH15a            | GATCTGCGGGCGGTTTCCTCT<br>AGATCCCCGCCTTCAGTT                               | Amplification of a 3560 bp fragment <sup>b</sup> including the complete <i>apra</i> resistance gene and surrounding genes for mutagenesis study                                                |

<sup>a</sup> PCR conditions: annealing temp., 55°C; elongation temp., 72°C (< 3 kb) or 68°C (> 3kb); PCR cycles applied, 30.

<sup>b</sup> The expected fragment length is for the mutant strain only; for the wild type strain the expected fragment is 1385 bp shorter due to exclusion of the apramycin gene.
